# Supplementary material for: Conductive MXene nanosheets infused in protein fiber hydrogels for bioprinting and thin film electrodes
Source: Royal Society of Chemistry journal article supplement (doi:10.1039/d4ma00112e), 2024-01-01
Supplement: d4ma00112e1.pdf [file d4ma00112e1.pdf]

### **Electronic supplementary information**

Conductive MXene nanosheets infused in curli fibers for bioprinting and thin film electrodes

Mario Alfonso Arenas García<sup>a</sup>, Slah Hidouri<sup>a</sup>, Joshua M. Little<sup>b</sup>, Daniel Modafferi<sup>a</sup>, Xinxin Hao<sup>a</sup>, Po-Yen Chen<sup>b</sup> & Noémie-Manuelle Dorval Courchesne<sup>a</sup>

<sup>a</sup>Department of Chemical Engineering, McGill University, 3610 University Street, Montréal, QC, H3A 0C5, Canada

<sup>b</sup>Department of Chemical and Biomolecular Engineering, University of Maryland, 4418 Stadium Drive, College Park, MD, 20742, United States

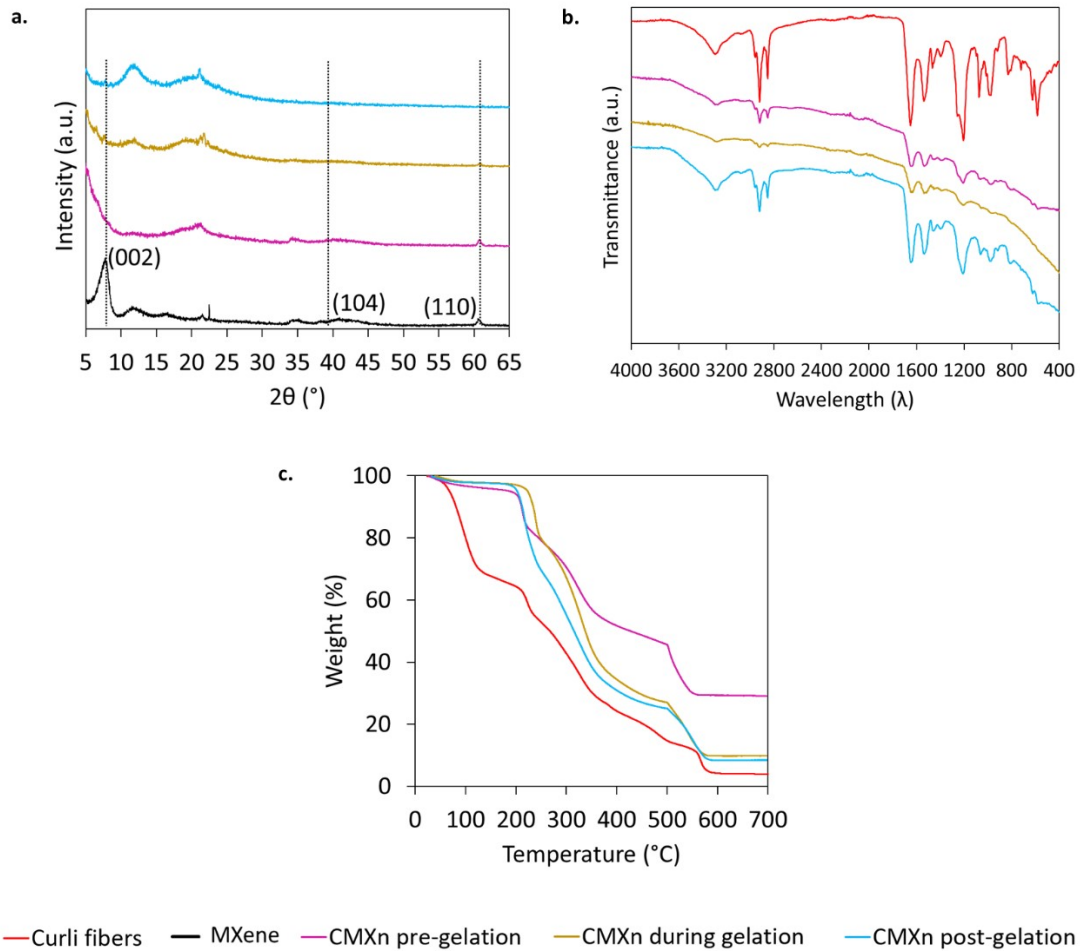

Figure S1. Characterization of curli-MXene nanocomposites (CMXn) for MXene integrated at different stages of the curli fiber isolation process via vacuum filtration (pre-gelation, during gelation and post-gelation). (a) X-ray diffraction (XRD), (b) Fourier-transform infrared (FTIR) spectroscopy and (c) thermogravimetric analysis (TGA).

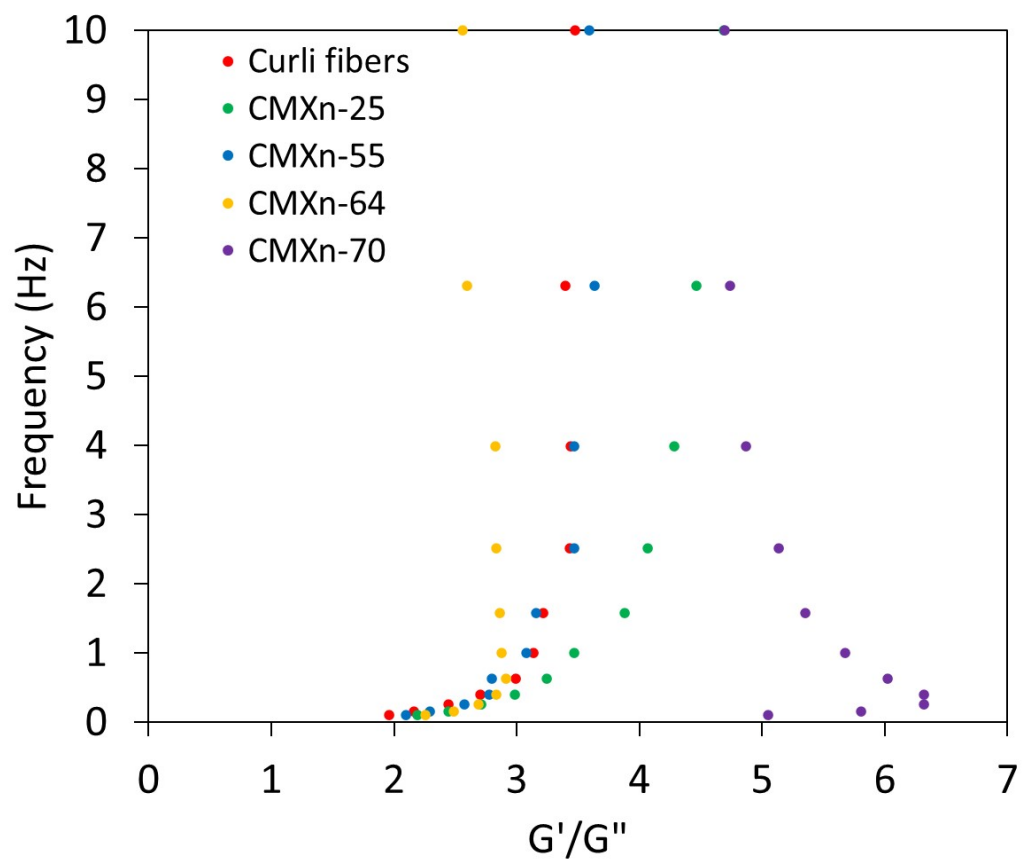

Figure S2.  $G'/G''$  ratios for frequency sweeps for curli fibers and CMXn with different loadings.

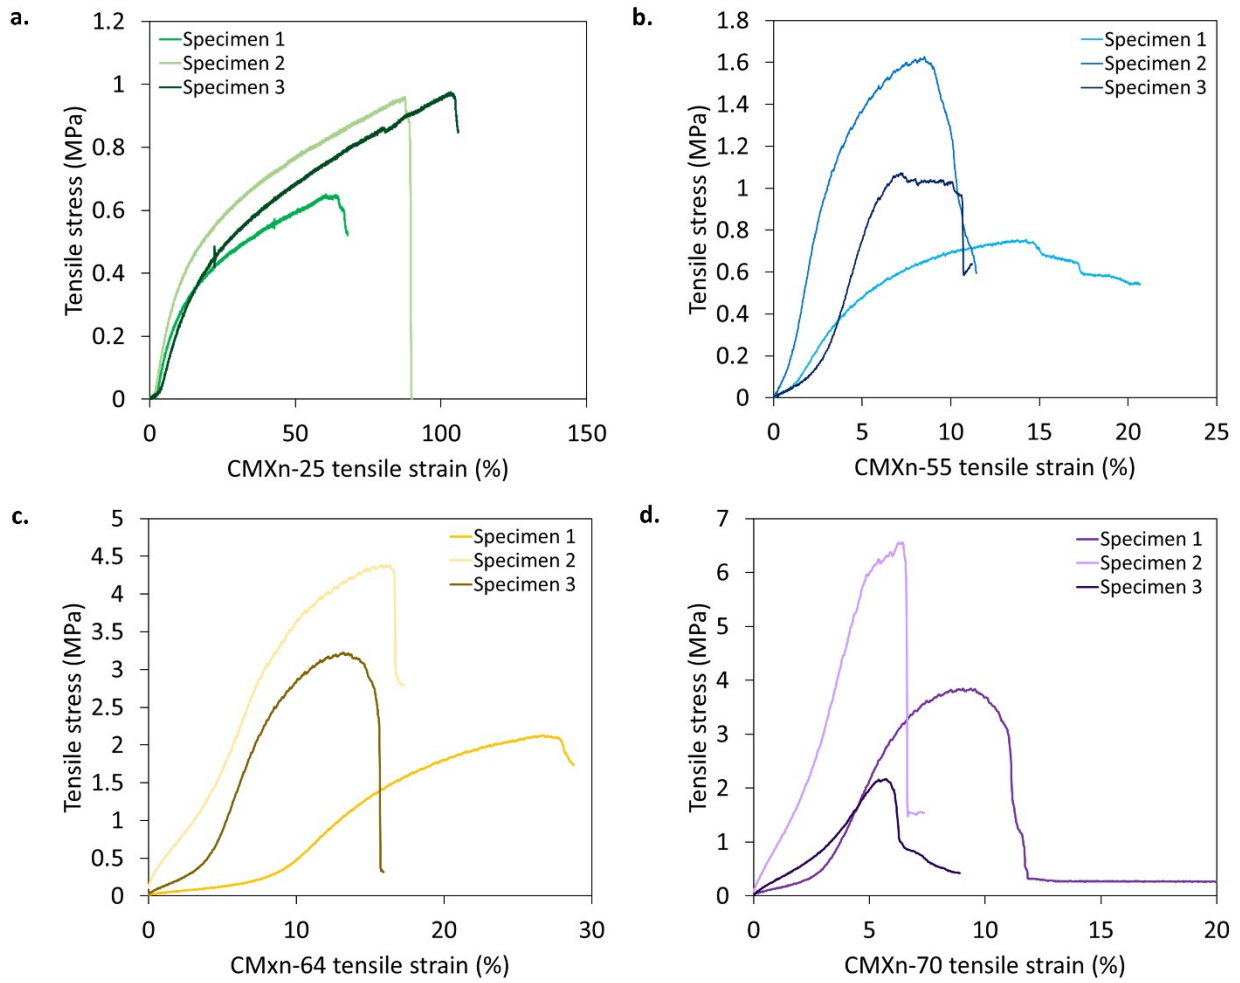

Figure S3. Stress-strain curves for CMXn thin films with different MXene loading: a) CMXn-25, b) CMXn-55, c) CMXn-64 and d) CMXn-70. Three replicates are presented for each loading.

Table S1. Nomenclature for MXene composites with their corresponding ultimate strain and conductivity values.

| Label     | Composite (name)                                                                      | Maximum $\epsilon$ (%) | Maximum conductivity (S/cm) | Reference |
|-----------|---------------------------------------------------------------------------------------|------------------------|-----------------------------|-----------|
| This work | CMXn                                                                                  | 83.81                  | 49.34                       | This work |
| i         | MXene-bacterial cellulose                                                             | 16                     | 1000                        | 1         |
| ii a      | Hydrogen-bonded MXene-carboxymethyl cellulose film (HBM)                              | 6.41                   | 7644                        | 2         |
| ii b      | Covalently bridged MXene-boron film (CBM)                                             | 2.13                   | 9746                        | 2         |
| ii c      | Sequentially bridged MXene- carboxymethyl cellulose-boron film (SBM)                  | 5.26                   | 6484                        | 2         |
| ii d      | Sequentially bridged MXene- carboxymethyl cellulose-boron doctor bladed film (SBM-DB) | 4.62                   | 5976                        | 2         |
| iii       | MXene-MMT-PVA                                                                         | 2                      | 1.25                        | 3         |
| iv        | MXene-chitosan                                                                        | 8.5                    | 9.69                        | 4         |
| v         | MXene                                                                                 | 2                      | 12300                       | 5         |
| vi        | MXene-polyurethane                                                                    | 1857                   | 0.01                        | 6         |
| vii a     | MXene-polyurethane, coagulating bath with isopropanol (IPA)                           | 6.41                   | 22.6                        | 7         |
| vii b     | MXene-polyurethane, coagulating bath with acetic acid (AcOH)                          | 6.41                   | 392                         | 7         |
| viii      | MXene, coagulation solution with $\text{NH}_4$ ions                                   | 0.22                   | 7713                        | 8         |

Table S2. Comparison of mechanical and conductive properties of MXene composites in literature.

| Assembly technique               | Composition                                                         | MXene loading (wt. %)          | Mechanical properties                                                                                                                          | Conductivity (S/cm)                               | Application                                                 | Reference |
|----------------------------------|---------------------------------------------------------------------|--------------------------------|------------------------------------------------------------------------------------------------------------------------------------------------|---------------------------------------------------|-------------------------------------------------------------|-----------|
| Vacuum assisted filtration (VAF) | MXene-curli fibers                                                  | <u>CMXn-25</u><br>25.12 ± 2.40 | <u>CMXn-25</u><br>Young's Modulus: 4.28 ± 1.06 MPa<br>Stress: 0.86 ± 0.18 MPa<br>Strain: 83.81 ± 21.60 %                                       | <u>CMXn-25</u><br>4.41 ± 1.21 x 10 <sup>-8</sup>  | Strain sensor, electromagnetic interference (EMI) shielding | This work |
|                                  |                                                                     | <u>CMXn-55</u><br>54.94 ± 7.43 | <u>CMXn-55</u><br>Young's Modulus: 101.17 ± 41.95 MPa<br>Stress: 7.97 ± 2.26 MPa<br>Strain: 20.03 ± 3.92 %                                     | <u>CMXn-55</u><br>34.98 ± 1.92 x 10 <sup>-3</sup> |                                                             |           |
|                                  |                                                                     | <u>CMXn-64</u><br>63.72 ± 9.88 | <u>CMXn-64</u><br>Young's Modulus: 39.67 ± 19.52 MPa<br>Stress: 3.25 ± 1.13 MPa<br>Strain: 18.75 ± 7.09 %                                      | <u>CMXn-64</u><br>21.51 ± 12.22                   |                                                             |           |
|                                  |                                                                     | <u>CMXn-70</u><br>69.67 ± 5.31 | <u>CMXn-70</u><br>Young's Modulus: 109.84 ± 56.69 MPa<br>Stress: 4.19 ± 2.22 MPa<br>Strain: 7.12 ± 1.98 %                                      | <u>CMXn-70</u><br>49.34 ± 28.27                   |                                                             |           |
|                                  | MXene-bacterial cellulose                                           | 43 – 83                        | Stress: 40 – 70 MPa<br>Strain: 6 – 16 %                                                                                                        | 250 – ~1000                                       | Micro-supercapacitor arrays                                 | 1         |
|                                  | Hydrogen-bonded MXene-carboxymethyl cellulose film (HBM)            | <u>HBM</u><br>81.5 – 95.7      | <u>HBM</u><br>Young's Modulus: 7.0 ± 0.1 – 12.9 ± 1.3 GPa<br>Tensile strength: 178 ± 7 – 310 ± 11 MPa<br>Strain: 3.62 ± 0.12 – 6.41 ± 0.17 %   | <u>HBM</u><br>1028 ± 29 – 7644 ± 82               | EMI shielding                                               |           |
|                                  | Covalently bridged MXene-boron film (CBM)                           | <u>CBM</u><br>98.68 – 99.72    | <u>CBM</u><br>Young's Modulus: 9.8 ± 0.8 – 25.0 ± 1.0 GPa<br>Tensile strength: 143 ± 5 – 263 ± 8 MPa<br>Strain: 1.34 ± 0.07 – 2.13 ± 0.11 %    | <u>CBM</u><br>9375 ± 113 – 9746 ± 128             |                                                             | 2         |
|                                  | Sequentially bridged MXene-carboxymethyl cellulose-boron film (SBM) | <u>SBM</u><br>89.93 – 90.57    | <u>SBM</u><br>Young's Modulus: 14.2 ± 0.8 – 29.4 ± 2.5 GPa<br>Tensile strength: 432 ± 17 – 583 ± 16 MPa<br>Strain: 3.71 ± 0.06 – 5.26 ± 0.27 % | <u>SBM</u><br>5850 ± 54 – 6484 ± 59               |                                                             |           |

Table S2. (continued)

| Assembly technique | Composition                                                                      | MXene loading (wt. %)                                                                  | Mechanical properties                                                                                                                              | Conductivity (S/cm)                               | Application                                 | Reference |
|--------------------|----------------------------------------------------------------------------------|----------------------------------------------------------------------------------------|----------------------------------------------------------------------------------------------------------------------------------------------------|---------------------------------------------------|---------------------------------------------|-----------|
| VAF                | MXene-graphdiyne nanotube                                                        | –                                                                                      | Can achieve bending angles up to 90°                                                                                                               | 1667                                              | Supercapacitors                             | 9         |
| Layer by layer     | MXene-MMT-PVA                                                                    | 45.5                                                                                   | Young's Modulus: 10.5 ± 6.6 GPa<br>Tensile strength: 225 ± 25 MPa<br>Strain: 2 %                                                                   | 0.53 to 1.25                                      | EMI shielding                               | 3         |
|                    | MXene-chitosan                                                                   | 9.1 – 25.9                                                                             | Stress: ~12 – 25 MPa<br>Strain: ~4.5 – ~8.5 %                                                                                                      | 0.14 – 9.69                                       | EMI shielding & thermal management capacity | 4         |
| Doctor blading     | MXene                                                                            | 100                                                                                    | Young's Modulus: 10.5 ± 6.6 GPa<br>Tensile strength: 225 ± 25 MPa<br>Strain: 2 %                                                                   | 10,220 ± 480 – 12,300 ± 170                       | Photodetectors                              | 5         |
|                    | Sequentially bridged MXene- carboxymethyl cellulose-boron film (SBM-DB)          | 90.23                                                                                  | Young's Modulus: 26.8 ± 1.3 GPa<br>Tensile strength: 559 ± 10 MPa<br>Strain: 4.62 ± 0.21 %                                                         | 5976 ± 68                                         | EMI shielding                               | 2         |
| Hot press          | MXene-polyurethane                                                               | 0.0 – 1.0                                                                              | Tensile strength: 17.3 – 20.6 MPa<br>Strain: 1700 – 1857 %                                                                                         | –                                                 | Coating, adhesives, etc.                    | 6         |
| Wet-spinning       | MXene-polyurethane, coagulating bath with isopropanol (IPA) & acetic acid (AcOH) | 0.50, 0.99, 1.96, 4.76, 9.09, 13.04, 16.67, 23.08, 28.57, 44.44, 61.54, 80.00 & 100.00 | <u>IPA bath</u><br>Young's Modulus: 7.0 ± 0.1 – 12.9 ± 1.3 GPa<br>Tensile strength: 178 ± 7 – 310 ± 11 MPa<br>Strain: 3.62 ± 0.12 – 6.41 ± 0.17 %  | <u>IPA bath</u><br>~5.0 x 10 <sup>-5</sup> – 22.6 | Textile strain sensors                      | 7         |
|                    |                                                                                  |                                                                                        | <u>AcOH bath</u><br>Young's Modulus: 7.0 ± 0.1 – 12.9 ± 1.3 GPa<br>Tensile strength: 178 ± 7 – 310 ± 11 MPa<br>Strain: 3.62 ± 0.12 – 6.41 ± 0.17 % | <u>AcOH bath</u><br>~4.0 x 10 <sup>-3</sup> – 392 |                                             |           |
|                    | MXene, coagulation solution with NH <sub>4</sub> ions                            | 100                                                                                    | Young's Modulus: 29.6 ± 5.1 GPa<br>Tensile strength: 63.9 ± 13.1MPa<br>Strain: 0.22 ± 0.05 %                                                       | 7713 ± 110                                        | Electrical wires                            | 8         |
| Rolling mill       | MXene                                                                            | 100                                                                                    | –                                                                                                                                                  | 1500                                              | –                                           | 10        |

## References

1. Jiao S, Zhou A, Wu M, Hu H. Kirigami Patterning of MXene/Bacterial Cellulose Composite Paper for All-Solid-State Stretchable Micro-Supercapacitor Arrays. *Advanced Science*. 2019;6(12):1900529.
2. Wan S, Li X, Chen Y, Liu N, Du Y, Dou S, et al. High-strength scalable MXene films through bridging-induced densification. *Science*. 2021;374(6563):96-9.
3. Lipton J, Weng G-M, Alhabeb M, Maleski K, Antonio F, Kong J, et al. Mechanically strong and electrically conductive multilayer MXene nanocomposites. *Nanoscale*. 2019;11(42):20295-300.
4. Tan Z, Zhao H, Sun F, Ran L, Yi L, Zhao L, et al. Fabrication of Chitosan/MXene multilayered film based on layer-by-layer assembly: Toward enhanced electromagnetic interference shielding and thermal management capacity. *Composites Part A: Applied Science and Manufacturing*. 2022;155:106809.
5. Zhang J, Kong N, Uzun S, Levitt A, Seyedin S, Lynch PA, et al. Scalable Manufacturing of Free-Standing, Strong Ti<sub>3</sub>C<sub>2</sub>T<sub>x</sub> MXene Films with Outstanding Conductivity. *Advanced Materials*. 2020;32(23):2001093.
6. Sheng X, Zhao Y, Zhang L, Lu X. Properties of two-dimensional Ti<sub>3</sub>C<sub>2</sub> MXene/thermoplastic polyurethane nanocomposites with effective reinforcement via melt blending. *Composites Science and Technology*. 2019;181:107710.
7. Seyedin S, Uzun S, Levitt A, Anasori B, Dion G, Gogotsi Y, et al. MXene Composite and Coaxial Fibers with High Stretchability and Conductivity for Wearable Strain Sensing Textiles. *Advanced Functional Materials*. 2020;30(12):1910504.
8. Eom W, Shin H, Ambade RB, Lee SH, Lee KH, Kang DJ, et al. Large-scale wet-spinning of highly electroconductive MXene fibers. *Nature Communications*. 2020;11(1):2825.
9. Wang Y, Chen N, Liu Y, Zhou X, Pu B, Qing Y, et al. MXene/Graphdiyne nanotube composite films for Free-Standing and flexible Solid-State supercapacitor. *Chemical Engineering Journal*. 2022;450:138398.
10. Ghidui M, Lukatskaya MR, Zhao M-Q, Gogotsi Y, Barsoum MW. Conductive two-dimensional titanium carbide 'clay' with high volumetric capacitance. *Nature*. 2014;516(7529):78-81.
